# Supplementary material
Source: Springer Nature journal article supplement (https://www.springermedizin.de/resource/supplementary/12905_2009_190_MOESM4_ESM.pdf/9518138)

**<40 yrs**  
**n=125**

**40-49 yrs**  
**n=321**

**50-59 yrs**  
**n=387**

**60-69 yrs**  
**n=493**

**70-79 yrs**  
**n=450**

**80+ yrs**  
**n=114**

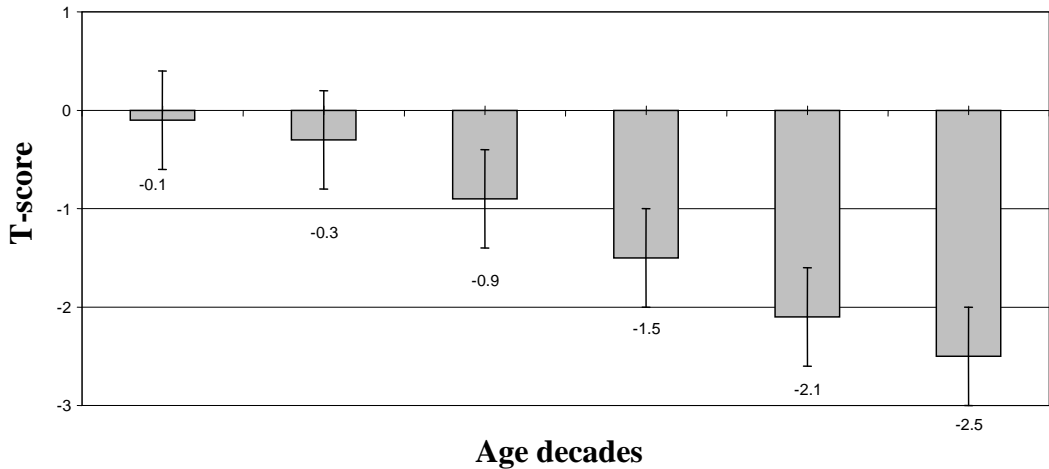

Supplement: MOESM4 [file 9518138]
